# Supplementary material for: Chemical Composition of Wild Collected and Cultivated Edible Plants (Sonchus oleraceus L. and Sonchus tenerrimus L.)
Source: MDPI journal article supplement (doi:10.3390/plants13020269), 2024-01-17
Supplement: s1 [file s1]

**Supplementary Table S1.** Mean, minimum and maximum values of primary metabolite concentrations ( $\mu\text{g g}^{\text{FW}^{-1}}$ ) in wild collected (year 1) *Sonchus* plants.

| Family         | Metabolite   |      | <i>S. oleraceus</i> | <i>S. tenerrimus</i> |
|----------------|--------------|------|---------------------|----------------------|
| Soluble sugars | Glucose      | Mean | 1895.8              | 1691.8               |
|                |              | Min  | 587.8               | 176.0                |
|                |              | Max  | 3685.2              | 3862.1               |
|                | Fructose     | Mean | 1401.9              | 257.4                |
|                |              | Min  | 0.0                 | 0.0                  |
|                |              | Max  | 3631.1              | 1295.5               |
|                | Sucrose      | Mean | 2472.3              | 1110.5               |
|                |              | Min  | 405.7               | 159.8                |
|                |              | Max  | 5337.9              | 2590.6               |
| Organic acids  | Citric       | Mean | 116.1               | 106.4                |
|                |              | Min  | 40.6                | 7.2                  |
|                |              | Max  | 322.5               | 421.6                |
|                | Malic        | Mean | 1410.3              | 842.0                |
|                |              | Min  | 157.7               | 144.6                |
|                |              | Max  | 2476.9              | 2526.1               |
|                | Tartaric     | Mean | 196.3               | 172.2                |
|                |              | Min  | 103.7               | 17.5                 |
|                |              | Max  | 275.6               | 388.3                |
|                | Succinic     | Mean | 15.9                | 14.3                 |
|                |              | Min  | 3.0                 | 2.1                  |
|                |              | Max  | 44.3                | 38.4                 |
|                | Quinic       | Mean | 80.1                | 49.6                 |
|                |              | Min  | 22.3                | 7.7                  |
|                |              | Max  | 132.0               | 86.8                 |
|                | Malonic      | Mean | 4.7                 | 6.1                  |
|                |              | Min  | 1.4                 | 1.1                  |
|                |              | Max  | 8.5                 | 14.8                 |
|                | Ketoglutaric | Mean | 9.3                 | 13.6                 |
|                |              | Min  | 2.2                 | 0.7                  |
|                |              | Max  | 19.8                | 94.5                 |
|                | Glutamic     | Mean | 19.5                | 17.5                 |
|                |              | Min  | 13.7                | 1.6                  |
|                |              | Max  | 27.6                | 36.1                 |
|                | Shikimic     | Mean | 4.7                 | 3.0                  |
|                |              | Min  | 2.1                 | 0.3                  |
|                |              | Max  | 10.5                | 4.3                  |

**Supplementary Table 2.** Mean, minimum and maximum values of secondary metabolite concentrations ( $\mu\text{g g}_{\text{FW}}^{-1}$ ) in wild collected (year 1) *Sonchus* plants.

| Family       | Metabolite                           |      | <i>S. oleraceus</i> | <i>S. tenerrimus s</i> |
|--------------|--------------------------------------|------|---------------------|------------------------|
| Chlorophylls | Chlorophyll a                        | Mean | 150.3               | 151.1                  |
|              |                                      | Min  | 87.9                | 9.8                    |
|              |                                      | Max  | 209.6               | 226.5                  |
|              | Chlorophyll b                        | Mean | 63.4                | 64.4                   |
|              |                                      | Min  | 36.8                | 2.8                    |
|              |                                      | Max  | 102.0               | 100.9                  |
| Carotenoids  | <i>All-trans</i> - $\beta$ -carotene | Mean | 40.6                | 38.6                   |
|              |                                      | Min  | 22.4                | 4.8                    |
|              |                                      | Max  | 61.9                | 58.7                   |
|              | Lutein                               | Mean | 21.9                | 19.9                   |
|              |                                      | Min  | 13.8                | 2.0                    |
|              |                                      | Max  | 35.2                | 31.7                   |
|              | <i>All-trans</i> -violaxanthin       | Mean | 6.2                 | 4.9                    |
|              |                                      | Min  | 4.3                 | 0.9                    |
|              |                                      | Max  | 10.3                | 7.9                    |
|              | 9 <i>cis</i> -Neoxanthin             | Mean | 8.0                 | 7.3                    |
|              |                                      | Min  | 3.8                 | 1.5                    |
|              |                                      | Max  | 13.9                | 16.1                   |
|              | 9 <i>cis</i> - $\beta$ -carotene     | Mean | 4.2                 | 4.0                    |
|              |                                      | Min  | 2.4                 | 0.5                    |
|              |                                      | Max  | 6.1                 | 6.1                    |
|              | Luteoxanthin                         | Mean | 8.6                 | 7.9                    |
|              |                                      | Min  | 2.4                 | 0.9                    |
|              |                                      | Max  | 20.3                | 14.3                   |
|              | 13 <i>cis</i> - $\beta$ -carotene    | Mean | 1.7                 | 1.5                    |
|              |                                      | Min  | 0.9                 | 0.2                    |
|              |                                      | Max  | 2.7                 | 2.5                    |
| Vitamins     | Vitamin C                            | Mean | 273.0               | 276.6                  |
|              |                                      | Min  | 143.7               | 129.0                  |
|              |                                      | Max  | 447.1               | 558.5                  |
| Phenolics    | Total phenolics                      | Mean | 0.4                 | 0.3                    |
|              |                                      | Min  | 0.1                 | 0.2                    |
|              |                                      | Max  | 0.9                 | 0.7                    |
